# Supplementary material for: A proton-exchange poly(acrylic acid) supramolecular hydrogel for ultrahigh uranium adsorption
Source: Royal Society of Chemistry journal article supplement (doi:10.1039/d1ta05756a), 2021-01-01
Supplement: d1ta05756a1.pdf [file d1ta05756a1.pdf]

## Supporting information

### A Proton-Exchange Poly (acrylic acid) Supramolecular Hydrogel for Ultrahigh Uranium Adsorption

Zhongkuan Sun, Yongyi Chen, Yan Liu, Bing Na\*, Cheng Meng, Shuang Zhang, Shufen Zou,  
Hesheng Liu

State Key Laboratory of Nuclear Resources and Environment, Jiangxi Province Key Laboratory of  
Polymer Micro/Nano Manufacturing and Devices, East China University of Technology, Nanchang,  
330013, People's Republic of China

**Figures: 3**

---

\*Correspondence author. E-mail address: [bnash@ecit.edu.cn](mailto:bnash@ecit.edu.cn), [bingnash@163.com](mailto:bingnash@163.com)

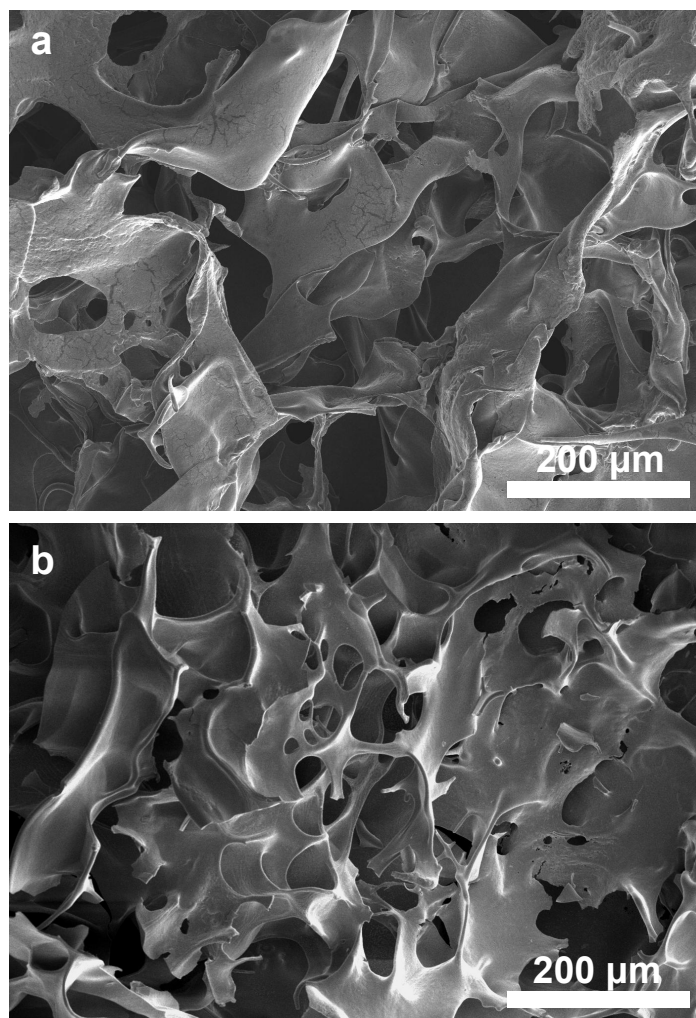

Figure S1 SEM micrographs of PAA (a) aerogel and (b) hydrogel.

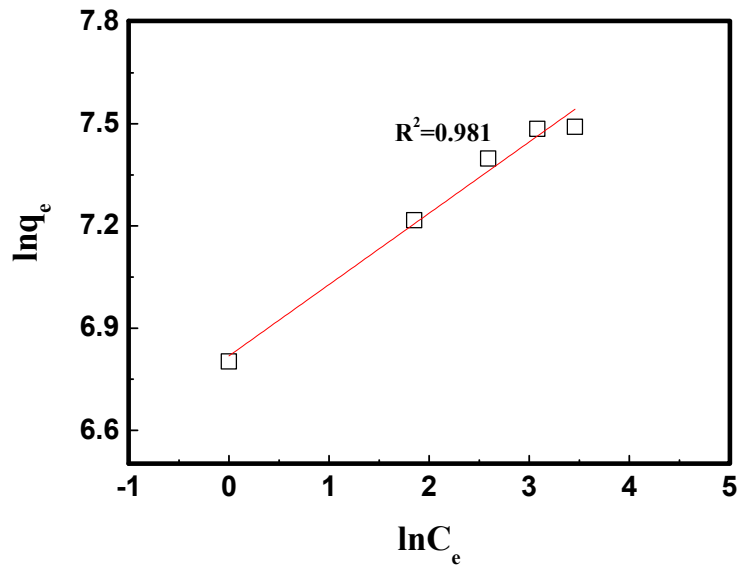

Figure S2 Fitting of adsorption isotherm of PAA hydrogel by Freundlich model

Freundlich model:  $\ln q_e = \ln K_f + \frac{1}{n} \ln C_e$

where  $K_f$  and  $n$  are the Freundlich constants related to the adsorption capacity and adsorption intensity, respectively.

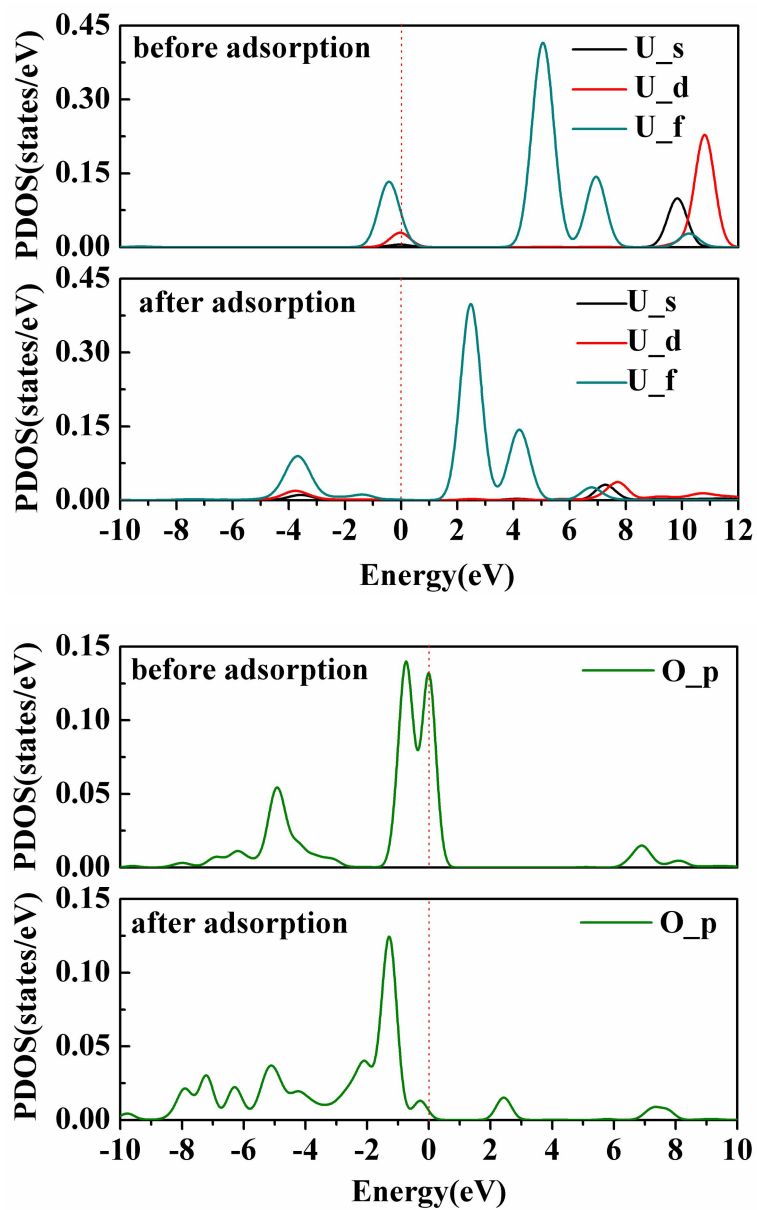

Figure S3 Projected density of states of U and O atoms before and after adsorption.
